# Supplementary material for: Perchlozone Resistance in Clinical Isolates of Mycobacterium tuberculosis
Source: MDPI journal article supplement (doi:10.3390/antibiotics12030590), 2023-03-15
Supplement: s1 [file s1]

**Table S1:** Summary of characterized clinical *M. tuberculosis* isolates.

| ID | Resistanc<br>e profile | Isoniazid |      | Ethionamide |     | Perchlorzone<br>MIC, 7H11 | Mutations    |                |             |             | Beijing<br>clonal<br>complex | MLVA<br>type | MIRU-VNTR      |        |        |        |        |              |        |      |       |        |        |         |        |        |       |        |        |        |        |        |               |        |      |        |   |   |
|----|------------------------|-----------|------|-------------|-----|---------------------------|--------------|----------------|-------------|-------------|------------------------------|--------------|----------------|--------|--------|--------|--------|--------------|--------|------|-------|--------|--------|---------|--------|--------|-------|--------|--------|--------|--------|--------|---------------|--------|------|--------|---|---|
|    |                        | Bactec    | MIC  | Bactec      | MIC |                           | <i>ethA</i>  | <i>P_fabG1</i> | <i>inhA</i> | <i>katG</i> |                              |              | MIRU04(ETRD-1) | MIRU26 | MIRU40 | MIRU10 | MIRU16 | MIRU31(ETRE) | Mtub04 | ETRC | ETR-A | Mtub30 | Mtub39 | Qub4156 | Qub11b | Mtub21 | Qub26 | MIRU02 | MIRU23 | MIRU39 | MIRU20 | MIRU24 | MIRU27 (Qub5) | Mtub29 | ETRB | Mtub34 |   |   |
| 7  | S                      | S         | 0.06 | S           | 2.5 | 4                         | wt           | wt             | wt          | wt          | CC1                          | 94-32        | 2              | 5      | 3      | 3      | 3      | 5            | 4      | 4    | 4     | 4      | 4      | 3       | 2      | 6      | 5     | 8      | 2      | 5      | 3      | 2      | 1             | 3      | 4    | 2      | 3 |   |
| 13 | S                      | S         | 0.06 | S           | 2.5 | 2                         | wt           | wt             | wt          | wt          | CC1                          | 94-32        | 2              | 5      | 3      | 3      | 3      | 5            | 4      | 4    | 4     | 4      | 4      | 3       | 2      | 6      | 5     | 8      | 2      | 5      | 3      | 2      | 1             | 3      | 4    | 2      | 3 |   |
| 14 | S                      | S         | 0.03 | S           | 1.2 | 2                         | wt           | wt             | wt          | wt          | CC1                          | 94-32        | 2              | 5      | 3      | 3      | 3      | 5            | 4      | 4    | 4     | 4      | 4      | 3       | 2      | 6      | 5     | 8      | 5      | 5      | 3      | 2      | 1             | 3      | 4    | 2      | 3 |   |
| 15 | S                      | S         | 0.03 | S           | 1.2 | 4                         | wt           | wt             | wt          | wt          | CC1                          | 94-32        | 2              | 5      | 3      | 3      | 3      | 5            | 4      | 4    | 4     | 4      | 4      | 3       | 2      | 6      | 5     | 8      | 5      | 5      | 3      | 2      | 1             | 3      | 4    | 2      | 3 |   |
| 22 | S                      | S         | 0.06 | S           | 2.5 | 8                         | wt           | wt             | g291a F97L  | wt          | CC1                          | 94-32        | 2              | 5      | 3      | 3      | 3      | 5            | 4      | 4    | 4     | 4      | 4      | 3       | 2      | 6      | 5     | 8      | 2      | 5      | 3      | 2      | 1             | 3      | 4    | 2      | 3 |   |
| 18 | MDR                    | R         | >4   | S           | 2.5 | 8                         | wt           | wt             | wt          | S315T       | CC1                          | 94-32        | 2              | 5      | 3      | 3      | 3      | 5            | 4      | 4    | 4     | 4      | 4      | 3       | 2      | 6      | 5     | 8      | 2      | 5      | 3      | 2      | 1             | 3      | 4    | 2      | 3 |   |
| 8  | MDR                    | R         | >4   | R           | >40 | 64                        | t276tggaa    | t(-8)g         | wt          | S315T       | CC1                          | 94-32        | 2              | 5      | 3      | 3      | 3      | 5            | 4      | 4    | 4     | 4      | 4      | 3       | 2      | 6      | 5     | 8      | 2      | 5      | 3      | 2      | 1             | 3      | 4    | 2      | 3 |   |
| 19 | S                      | S         | 0.06 | S           | 2.5 | 4                         | wt           | wt             | wt          | wt          | CC1                          | 95-32        | 2              | 5      | 3      | 3      | 3      | 5            | 4      | 4    | 4     | 4      | 3      | 4       | 3      | 2      | 6     | 5      | 8      | 2      | 5      | 3      | 2             | 1      | 3    | 4      | 2 | 3 |
| 21 | S                      | S         | 0.06 | S           | 2.5 | 4                         | wt           | wt             | wt          | wt          | CC1                          | 99-32        | 2              | 5      | 3      | 3      | 3      | 5            | 4      | 4    | 4     | 4      | 3      | 4       | 4      | 2      | 6     | 5      | 7      | 2      | 5      | 3      | 2             | 1      | 3    | 4      | 2 | 3 |
| 2  | MDR                    | R         | 4    | R           | 10  | 64                        | t(-6)c       | wt             | wt          | S315T       | CC1                          | 1065-32      | 2              | 5      | 3      | 3      | 3      | 5            | 4      | 4    | 4     | 4      | 4      | 3       | 2      | 6      | 5     | 6      | 2      | 5      | 3      | 2      | 1             | 3      | 4    | 2      | 3 |   |
| 11 | MDR                    | R         | >4   | R           | 10  | 32                        | t(-7)c       | wt             | g707a T236K | S315T       | CC1                          | 1065-32      | 2              | 5      | 3      | 3      | 3      | 5            | 4      | 4    | 4     | 4      | 4      | 3       | 2      | 6      | 5     | 6      | 2      | 5      | 3      | 2      | 1             | 3      | 4    | 2      | 3 |   |
| 5  | MDR                    | R         | 2    | R           | 40  | 16                        | wt           | c(-15)t        | t589c I194V | wt          | CC1                          | 9136-32      | 2              | 5      | 4      | 3      | 3      | 4            | 4      | 4    | 4     | 4      | 4      | 3       | 2      | 1      | 5     | 7      | 2      | 5      | 3      | 2      | 1             | 3      | 4    | 2      | 3 |   |
| 1  | MDR                    | R         | 4    | S           | 2.5 | 2                         | wt           | wt             | wt          | S315T       | CC2                          | 100-32       | 2              | 7      | 3      | 3      | 3      | 5            | 4      | 4    | 4     | 4      | 4      | 3       | 2      | 6      | 5     | 7      | 2      | 5      | 3      | 2      | 1             | 3      | 4    | 2      | 3 |   |
| 3  | MDR                    | R         | 2    | S           | 0.6 | 16                        | t1319c L440P | wt             | wt          | S315T       | CC2                          | 100-32       | 2              | 7      | 3      | 3      | 3      | 5            | 4      | 4    | 4     | 4      | 4      | 3       | 2      | 6      | 5     | 7      | 2      | 5      | 3      | 2      | 1             | 3      | 4    | 2      | 3 |   |
| 6  | MDR                    | R         | 4    | R           | 10  | 64                        | g(-55)a      | wt             | wt          | S315T       | CC2                          | 100-32       | 2              | 7      | 3      | 3      | 3      | 5            | 4      | 4    | 4     | 4      | 4      | 3       | 2      | 6      | 5     | 7      | 2      | 5      | 3      | 2      | 1             | 3      | 4    | 2      | 3 |   |
| 9  | pre-XDR                | R         | 4    | R           | 20  | 32                        | ga106g       | wt             | wt          | S315T       | CC2                          | 100-32       | 2              | 7      | 3      | 3      | 3      | 5            | 4      | 4    | 4     | 4      | 4      | 3       | 2      | 6      | 5     | 7      | 2      | 5      | 3      | 2      | 1             | 3      | 4    | 2      | 3 |   |
| 10 | MDR                    | R         | >4   | R           | 10  | 16                        | ga337g       | c(-34)t        | wt          | S315T       | CC2                          | 100-32       | 2              | 7      | 3      | 3      | 3      | 5            | 4      | 4    | 4     | 4      | 4      | 3       | 2      | 6      | 5     | 7      | 2      | 5      | 3      | 2      | 1             | 3      | 4    | 2      | 3 |   |
| 12 | pre-XDR                | R         | >4   | R           | 10  | 32                        | ga106g       | wt             | wt          | S315T       | CC2                          | 100-32       | 2              | 7      | 3      | 3      | 3      | 5            | 4      | 4    | 4     | 4      | 4      | 3       | 2      | 6      | 5     | 7      | 2      | 5      | 3      | 2      | 1             | 3      | 4    | 2      | 3 |   |
| 4  | MDR                    | R         | 1    | S           | 2.5 | 2                         | wt           | wt             | wt          | S315T       | CC2                          | 9375-32      | 2              | 7      | 4      | 3      | 3      | 5            | 4      | 4    | 4     | 4      | 4      | 3       | 2      | 6      | 5     | 7      | 2      | 5      | 3      | 2      | 1             | 3      | 4    | 2      | 3 |   |
| 20 | MDR                    | R         | >4   | R           | 20  | 64                        | ct702c       | wt             | g535a A179T | S315T       | CC2                          | 5317-32      | 2              | 7      | 3      | 3      | 3      | 2            | 4      | 4    | 4     | 4      | 4      | 3       | 2      | 6      | 5     | 7      | 2      | 5      | 3      | 2      | 1             | 3      | 4    | 2      | 3 |   |
| 16 | S                      | S         | 0.03 | S           | 0.6 | 4                         | wt           | wt             | wt          | wt          | CC3                          | 1068-32      | 2              | 4      | 3      | 3      | 3      | 5            | 4      | 4    | 4     | 4      | 4      | 3       | 2      | 6      | 5     | 8      | 5      | 5      | 3      | 2      | 1             | 3      | 4    | 2      | 3 |   |
| 17 | MDR                    | R         | 4    | R           | 2.5 | 32                        | ct882c       | wt             | wt          | S315T       | CC3                          | 1066-32      | 2              | 7      | 3      | 3      | 3      | 4            | 4      | 4    | 4     | 4      | 4      | 3       | 2      | 6      | 5     | 6      | 5      | 5      | 3      | 2      | 1             | 3      | 4    | 2      | 3 |   |
